# Supplementary material for: Influence of skeletal muscle volume loss during lenvatinib treatment on prognosis in unresectable hepatocellular carcinoma: a multicenter study in Tohoku, Japan
Source: PubMed Central journal article supplement (PMC9021276; doi:10.1038/s41598-022-10514-3), 2022-04-20
Supplement: 41598_2022_10514_MOESM1_ESM.pdf [file 41598_2022_10514_MOESM1_ESM.pdf]

Table S1. Adverse events (AEs) in the low and normal PMI groups

|                        | Grade 3 or worse    |                  |         | Any grade  |            |         |
|------------------------|---------------------|------------------|---------|------------|------------|---------|
|                        | normal PMI (n = 67) | Low PMI (n = 63) | P value | normal PMI | Low PMI    | P value |
| Hypertension           | 2 (3.0%)            | 3 (4.8%)         | 0.603   | 24 (35.8%) | 25 (39.7%) | 0.783   |
| Diarrhea               | 2 (3.0%)            | 1 (1.6%)         | 0.605   | 14 (20.9%) | 13 (20.6%) | 0.978   |
| Anorexia               | 1 (1.5%)            | 4 (6.3%)         | 0.153   | 25 (37.3%) | 24 (38.1%) | 0.922   |
| Fatigue                | 1 (1.5%)            | 4 (6.3%)         | 0.153   | 29 (43.3%) | 19 (30.2%) | 0.169   |
| Hoarseness             | 0 (0%)              | 0 (0%)           |         | 10 (14.9%) | 11 (17.5%) | 0.694   |
| Hypothyroidism         | 0 (0%)              | 0 (0%)           |         | 21 (31.3%) | 20 (31.7%) | 0.957   |
| Body weight loss       | 0 (0%)              | 0 (0%)           |         | 10 (14.9%) | 7 (11.1%)  | 0.525   |
| Hand foot syndrome     | 2 (3.0%)            | 3 (4.8%)         | 0.603   | 27 (40.3%) | 21 (33.3%) | 0.521   |
| Proteinuria            | 4 (6.0%)            | 7 (11.1%)        | 0.294   | 18 (26.9%) | 15 (23.8%) | 0.696   |
| Liver damage           | 1 (1.5%)            | 1 (1.6%)         | 0.973   | 7 (10.4%)  | 6 (9.5%)   | 0.868   |
| Hepatic encephalopathy | 3 (4.5%)            | 1 (1.6%)         | 0.779   | 4 (5.9%)   | 3 (4.8%)   | 0.754   |

AEs were assessed according to the National Cancer Institute Common Terminology Criteria for Adverse Events, version 4.0.

PMI: psoas muscle index, Low PMI group: PMI <6.0 cm<sup>2</sup>/m<sup>2</sup> for men and <3.4 cm<sup>2</sup>/m<sup>2</sup> for women, normal PMI group: PMI ≥6.0 cm<sup>2</sup>/m<sup>2</sup> for men and ≥3.4 cm<sup>2</sup>/m<sup>2</sup> for women.

Table S2. Adverse events (AEs) in the severe and mild atrophy groups

|                        | Grade 3 or worse      |                         | P value      | Any grade    |                |         |
|------------------------|-----------------------|-------------------------|--------------|--------------|----------------|---------|
|                        | Mild atrophy (n = 65) | Severe atrophy (n = 65) |              | Mild atrophy | Severe atrophy | P value |
| Hypertension           | <b>5 (7.7%)</b>       | <b>0 (0%)</b>           | <b>0.021</b> | 20 (30.8%)   | 23 (35.4%)     | 0.616   |
| Diarrhea               | 3 (4.6%)              | 0 (0%)                  | 0.078        | 16 (24.6%)   | 11 (16.9%)     | 0.242   |
| Anorexia               | 2 (3.1%)              | 3 (4.6%)                | 0.681        | 24 (36.9%)   | 25 (38.5%)     | 0.97    |
| Fatigue                | 1 (1.5%)              | 4 (6.2%)                | 0.187        | 22 (33.8%)   | 25 (38.5%)     | 0.681   |
| Hoarseness             | 0 (0%)                | 0 (0%)                  |              | 11 (16.9%)   | 10 (15.4%)     | 0.754   |
| Hypothyroidism         | 0 (0%)                | 0 (0%)                  |              | 18 (27.7%)   | 23 (35.4%)     | 0.412   |
| Body weight loss       | 0 (0%)                | 0 (0%)                  |              | 10 (15.3%)   | 7 (10.8%)      | 0.398   |
| Hand foot syndrome     | 2 (3.1%)              | 3 (4.6%)                | 0.681        | 22 (33.8%)   | 25 (38.5%)     | 0.681   |
| Proteinuria            | 8 (12.3%)             | 3 (4.6%)                | 0.105        | 11 (16.9%)   | 14 (21.5%)     | 0.266   |
| Liver damage           | 1 (1.5%)              | 1 (1.5%)                | 0.991        | 6 (9.2%)     | 7 (10.8%)      | 0.82    |
| Hepatic encephalopathy | 2 (3.1%)              | 2 (3.1%)                | 0.579        | 3 (4.6%)     | 4 (6.2%)       | 0.721   |

AEs were assessed according to the National Cancer Institute Common Terminology Criteria for Adverse Events, version 4.0.

PMI: psoas muscle index, Severe atrophy group:  $\Delta$ PMI/m rate >1%, Mild atrophy group:  $\Delta$ PMI/m rate <1%.
